# Supplementary material
Source: PubMed Central journal article supplement (PMC3180911)
Supplement: NIHMS319441-supplement-01.pdf [file NIHMS319441-supplement-01.pdf]

# BzpF is a CREB-like transcription factor that regulates spore maturation and stability in *Dictyostelium*

Eryong Huang<sup>1</sup>, Shaheynoor Talukder<sup>2</sup>, Timothy R. Hughes<sup>2</sup>, Tomaz Curk<sup>3</sup>, Blaz Zupan<sup>3</sup>, Gad Shaulsky<sup>1</sup> and Mariko Katoh-Kurasawa<sup>1,\*</sup>

## Supplementary Materials Table of Contents

This supplement includes 2 supplementary data, 7 supplementary tables and 2 supplementary figures.

### Supplementary datasets

Dataset S1. The binding preference of BzpF by PBM analysis (datasets\_S1\_PBM)

Dataset S2. RNA sequencing data (datasets\_S2\_RNAseq)

### Supplementary Tables

Table S1. *D. discoideum* strains

Table S2. qRT-PCR primers

Table S3. DNA binding preference of BzpF (E-score > 0.4)

Table S4. BzpF target candidates by computational prediction

Table S5. Additional BzpF target candidates by transcriptome comparison

Table S6. Differentially-expressed genes (Biological function)

Table S7. Differentially-expressed genes (prespore, prestalk marker genes)

### Supplementary Figure Legends

**Fig. S1. Amino acid sequence alignment of *D. discoideum* (Dd) and *D. purpureum* (Dp) BzpFs.** Predicted amino acid sequence of *Dp* BzpF is made from a contig assembled from RNA-seq reads (Parikh 2011). Two poly-Glutamine sequences (Q-rich), bZIP domain, CREB Signature sequence and Nuclear Localization Signal (NLS) are indicated. Asterisk shows the Serine residue in a PKA phosphorylation consensus sequence. Arrowhead indicates the end of the truncated BzpF peptide (1-137 amino acids) expressed as a consequence of deletion in *bzpf*<sup>-</sup>. Note that the sequence of C-terminal half including bZIP domain and a short N-terminal sequence (1-56 amino acids) are conserved.

**Fig. S2. *bzpf*<sup>-</sup> spores are compromised.** We tested spores of AX4 and *bzpf*<sup>-</sup> from 2-day old fruiting bodies by phase-contrast microscopy and by staining with fluorescent dyes. Strain names are indicated on the left of each panel and the visualization method is on the top. (A) Staining with FITC-lectin to test the integrity of spores in AX4 and *bzpf*<sup>-</sup> with/without urea treatment. Bar = 20 μm. (B) Calcofluor white staining to test the integrity of the middle spore coat layer. Bar = 5 μm.

Table S1. *D. discoideum* strains

| <b>Strain name</b> | <b>Strain Descriptor</b>                                   | <b>Parental strain</b> | <b>Antibiotic resistance</b> |
|--------------------|------------------------------------------------------------|------------------------|------------------------------|
| AX4                | AX4 (Wild type)                                            | AX3                    |                              |
| EH001              | <i>bzpF</i> <sup>-</sup>                                   | AX4                    | BlasticidinS                 |
| EH002              | <i>bzpF</i> <sup>-</sup> /[act15]: <i>bzpF</i> (4-628):GFP | EH001                  | G418                         |
| EH003              | <i>bzpF</i> <sup>-</sup> /[act15]: <i>bzpF</i> (4-628):GFP | EH001                  | G418                         |

Table S2. qRT-PCR primers

|                          |                                                          |
|--------------------------|----------------------------------------------------------|
| <b>C_1</b> bzpF *        | F GTCTTATTGAAGGTGACTCCA<br>R AAATTAACCATTTGATTGTTTATTTTG |
| <b>C_3</b> DDB_G0285833  | F CAAATAGTTTAGCTAGATTTGCA<br>R TTAAGCATCGTCAACAACCTAAG   |
| <b>C_5</b> sigD          | F TTCAACTACTGGAATACTGG<br>R CTAATACACAATGAGCTAAACC       |
| <b>C_6</b> DDB_G0267964  | F GTAAACAACATACAATAAAAACC<br>R TACCATTTTCTTTATCAAGTGG    |
| <b>C_8</b> DDB_G0267898  | F ATGTTACCCAAGGTAGTGC<br>R CCACGTGGATACCATAGC            |
| <b>C_12</b> DDB_G0270980 | F CAAGTTGAAAATGCAATAATGG<br>R ATACATGATGTTTTGCACTACC     |
| <b>C_13</b> DDB_G0271570 | F AGTTCAACAGGTAGTGCTGG<br>R TTCCAATGTTTCTTTATCATCACC     |
| <b>C_15</b> DDB_G0270474 | F AATTTTCGATTCAAGTCACCA<br>R ATTGCATATAAAGTAGGTTTTGG     |
| <b>C_16</b> DDB_G0290419 | F TGGGTTTCATTCAGTATTTTAGC<br>R AATATTTTCAGCACCAACAGC     |
| <b>C_17</b> DDB_G0293262 | F TTTCTAAAGGTGGTGATATTCC<br>R TTTGAGTGAAAACACCTTGCA      |
| <b>C_18</b> gxcl         | F AGAATTAAGAAAATCATTAGAACC<br>R ATTTGAGGTTGAGATTGTTCC    |

|                         |                                                      |
|-------------------------|------------------------------------------------------|
| <b>R_1</b> DDB_G0271972 | F GAGCTTTTTGTTCACCTACC<br>R ATGGAGATGGGGTACCAG       |
| <b>R_2</b> mpA          | F TGGTGAGAGTAAAGGATTTGG<br>R TGGTGACATTAAGAAATCGATTG |
| <b>R_3</b> sigK         | F TTCAATACACCATTCGTCCCT<br>R CAATTTAAGCAGTTGAGCGAAC  |
| <b>R_4</b> DDB_G0276285 | F TGAAACTTTGGCTTCTTGGTG<br>R TTACAAATGCAGCAACAATACC  |
| <b>R_5</b> DDB_G0269730 | F CAGTTGAAGAACAAGATAAACC<br>R CAGGAGAAGAAGTTTGTTTTGC |

\* Here we considered sequences that remained intact in the knockout strains at the 5' end of the gene.

Table S3. DNA binding preference of BzpF (E-score > 0.4)

| binding sequence | E-score |
|------------------|---------|
| <b>ATGACGTA</b>  | 0.496   |
| <b>ATTACGTA</b>  | 0.493   |
| <b>ACGTCATC</b>  | 0.484   |
| <b>ACGTAATC</b>  | 0.482   |
| <b>ATACGTAA</b>  | 0.482   |
| <b>TACGTATA</b>  | 0.474   |
| <b>ATACGTAT</b>  | 0.473   |
| <b>CTTACGTA</b>  | 0.470   |
| <b>TTACGTAA</b>  | 0.466   |
| <b>CATACGTA</b>  | 0.460   |
| <b>TGACGTAA</b>  | 0.442   |
| <b>ACGTATAA</b>  | 0.437   |
| <b>GCCACGTA</b>  | 0.437   |
| <b>ATACGTCA</b>  | 0.431   |
| <b>TGACGTCA</b>  | 0.427   |
| <b>ACGTCATA</b>  | 0.421   |
| <b>CGTCATCA</b>  | 0.420   |
| <b>ATACGTGG</b>  | 0.415   |
| <b>ACACGTAT</b>  | 0.408   |
| <b>GTGACGTA</b>  | 0.406   |

\* For complete analysis,  
see Supplementary datasets S1; excel file "datasets\_S1\_PBM.xls".

Table S4. BzpF target candidates by computational prediction

| #           | DDB_G #      | Gene name   | score | P-value | annotation                                                                                               | logAX4/bzpF- (AX4 raw reads) |
|-------------|--------------|-------------|-------|---------|----------------------------------------------------------------------------------------------------------|------------------------------|
| <b>C_1</b>  | DDB_G0279529 | <i>bzpF</i> | 4.64  | 0.000   | basic-leucine zipper (bZIP) transcription factor                                                         | <b>2.9 (918)</b>             |
| C_2         | DDB_G0283007 |             | 3.72  | 0.001   | unknown                                                                                                  | -0.3 (6808)                  |
| <b>C_3</b>  | DDB_G0285833 |             | 2.77  | 0.004   | unknown                                                                                                  | <b>2.0 (202)</b>             |
| C_4         | DDB_G0292442 |             | 2.76  | 0.007   | NAD+ kinase family protein, phosphorylates NAD+ to NADP+                                                 | 0.9 (875)                    |
| <b>C_5</b>  | DDB_G0267474 | <i>sigD</i> | 1.88  | 0.028   | sig = SrfA-Induced Gene, spore coat protein                                                              | <b>2.1 (5089)</b>            |
| <b>C_6</b>  | DDB_G0267964 |             | 1.88  | 0.028   | unknown                                                                                                  | <b>1.6 (104)</b>             |
| C_7         | DDB_G0271326 |             | 1.88  | 0.028   | contains a predicted cell-cell adhesion domain (Dicty_CAD)                                               | 0.8 (161)                    |
| <b>C_8</b>  | DDB_G0267898 |             | 1.85  | 0.038   | EGF(epidermal growth factor) -like domain-containing protein, two EGF repeats : expressed in pstAB cells | <b>1.3 (517)</b>             |
| C_9         | DDB_G0285813 |             | 1.85  | 0.038   | coiled-coil domain containing protein, belongs to DUB812 family                                          | -0.1 (251)                   |
| C_10        | DDB_G0282127 |             | 1.84  | 0.064   | unknown                                                                                                  | 0.5 (52)                     |
| C_11        | DDB_G0291598 |             | 1.84  | 0.047   | unknown                                                                                                  | 0.4 (2197)                   |
| <b>C_12</b> | DDB_G0270980 |             | 1.82  | 0.116   | unknown                                                                                                  | <b>2.9 (386)</b>             |
| <b>C_13</b> | DDB_G0271570 |             | 1.82  | 0.116   | unknown                                                                                                  | <b>2.1 (116)</b>             |
| C_14        | DDB_G0290025 |             | 1.82  | 0.116   | unknown                                                                                                  | 0.4 (70)                     |
| <b>C_15</b> | DDB_G0270474 |             | 1.35  | 0.003   | unknown                                                                                                  | <b>1.3 (112)</b>             |
| <b>C_16</b> | DDB_G0290419 |             | 0.91  | 0.035   | DUF298 family protein, DCUN1 domain-containing protein                                                   | <b>4.7 (562)</b>             |
| <b>C_17</b> | DDB_G0293262 |             | 0.90  | 0.059   | contains a predicted signal peptide, similar to DDB_G0268828                                             | <b>1.4 (1361)</b>            |
| <b>C_18</b> | DDB_G0290023 | <i>gxcL</i> | 0.89  | 0.079   | RacGEF, pleckstrin homology (PH) domain-containing protein<br>RhoGEF domain-containing protein           | <b>2.3 (927)</b>             |

Table S5. Additional BzpF target candidates by transcriptome comparison

| #    | DDB_G#       | Gene         | annotation                                                                                | logAX4/bzpF <sup>-</sup><br>(AX4 raw reads) |
|------|--------------|--------------|-------------------------------------------------------------------------------------------|---------------------------------------------|
| R_1  | DDB_G0271972 |              | unknown                                                                                   | <b>6.8 (269)</b>                            |
| R_2  | DDB_G0282293 | <i>mpA</i>   | putative RNA binding protein (RNP)<br>regulated by the MADS-box transcription factor SrfA | <b>3.9 (501)</b>                            |
| R_3  | DDB_G0267476 | <i>sigK</i>  | EGF-like domain-containing protein<br>regulated by the MADS-box transcription factor SrfA | <b>3.2 (8095)</b>                           |
| R_4  | DDB_G0276285 |              | unknown                                                                                   | <b>3.0 (2370)</b>                           |
| R_5  | DDB_G0269730 |              | unknown                                                                                   | <b>2.9 (1033)</b>                           |
| R_6  | DDB_G0290703 | <i>pks31</i> | putative polyketide synthase                                                              | 2.8 (173)                                   |
| R_7  | DDB_G0274433 |              | CBS (cystathionine-beta-synthase) domain-containing protein                               | 2.5 (213)                                   |
| R_8  | DDB_G0271662 | <i>pks10</i> | putative polyketide synthase                                                              | 2.0 (180)                                   |
| R_9  | DDB_G0271196 |              | contains a predicted cell-cell adhesion domain (Dicty_CAD)                                | 1.9 (296)                                   |
| R_10 | DDB_G0288389 |              | unknown                                                                                   | 1.4 (117)                                   |
| R_11 | DDB_G0280581 |              | unknown                                                                                   | 1.4 (237)                                   |
| R_12 | DDB_G0268746 |              | contains a UBX domain, found in ubiquitin-regulatory proteins                             | 1.3 (365)                                   |
| R_13 | DDB_G0290075 |              | protein phosphatase 2C                                                                    | 1.1 (473)                                   |

Table S6. Differentially-expressed genes

|                                                             |                       |                      |                      |                       |                      |                     |                 |                 |                    |                 |                 |                 |                 |  |  |
|-------------------------------------------------------------|-----------------------|----------------------|----------------------|-----------------------|----------------------|---------------------|-----------------|-----------------|--------------------|-----------------|-----------------|-----------------|-----------------|--|--|
| transcription factor                                        | <u>bzpF</u> *<br>2.9  | G0291348<br>1.2      | <u>gtaE</u><br>1.1   | <u>gtaG</u><br>1.0    |                      |                     |                 |                 |                    |                 |                 |                 |                 |  |  |
| antioxidant                                                 | <u>trxD</u><br>2.5    | <u>gcsA</u><br>1.7   |                      |                       |                      |                     |                 |                 |                    |                 |                 |                 |                 |  |  |
| cytokinin synthesis                                         | <u>iptA</u><br>2.6    |                      |                      |                       |                      |                     |                 |                 |                    |                 |                 |                 |                 |  |  |
| Pplyketide synthase                                         | <u>pks31</u> *<br>2.8 | G0287501<br>2.3      | <u>pks24</u><br>2.2  | <u>pks10</u> *<br>2.0 | <u>pks5</u><br>1.6   | <u>pks23</u><br>1.5 |                 |                 |                    |                 |                 |                 |                 |  |  |
| SrfA-Induced Gene                                           | <u>sigL-1</u><br>4.8  | <u>rnpA</u> *<br>3.9 | <u>sigK</u> *<br>3.2 | <u>sigM</u><br>2.2    | <u>sigD</u> *<br>2.1 | <u>sigI</u><br>1.2  |                 |                 |                    |                 |                 |                 |                 |  |  |
| coat protein                                                | <u>sigD</u> *<br>2.1  | <u>cotE</u><br>1.7   | G0282407<br>1.5      |                       |                      |                     |                 |                 |                    |                 |                 |                 |                 |  |  |
| germination                                                 | <u>gerA</u><br>5.9    | G0287549<br>5.8      | <u>gerB</u><br>5.1   | <u>gerC</u><br>4.9    |                      |                     |                 |                 |                    |                 |                 |                 |                 |  |  |
| Lipoprotein /<br>oxysterol binding /<br>cysteine proteinase | <u>expl2</u><br>2.8   | <u>osbK</u><br>1.7   | <u>cprF</u><br>1.0   |                       |                      |                     |                 |                 |                    |                 |                 |                 |                 |  |  |
| cellulose-binding<br>domain                                 | <u>ecmL</u><br>26.8   | G0281233<br>9.6      | G0278437<br>9.0      | G0278399<br>8.7       | <u>staA</u><br>7.3   | G0268756<br>6.5     | G0278439<br>6.5 | G0278423<br>5.8 | <u>staB</u><br>5.8 | G0282589<br>3.9 | G0278519<br>3.6 | G0289363<br>3.5 | G0278537<br>1.7 |  |  |
| glycoside hydrolase<br>domain                               | G0284239<br>5.5       | G0271314<br>3.1      | G0284295<br>1.3      | G0268446<br>1.0       |                      |                     |                 |                 |                    |                 |                 |                 |                 |  |  |

- 1) Green: preferential pst expression, Red: preferential psp expression, \* : dCRE motif in the promoter region, underlines: spore and sporulation defect mutant, numbers: log AX4/*bzpF*<sup>-</sup>
- 2) *gcsA*<sup>-</sup>: abolished sporulation | aberrant spore coat morphology | abolished cellulose biosynthesis | abolished stalk formation | abolished stalk cell differentiation  
*cotE*<sup>-</sup>: aberrant spore coat morphology  
*iptA*<sup>-</sup>: decreased spore viability

Table S7. Differentially-expressed genes (prespore, prestalk marker genes)

PSP genes

| DDB_G ID     | gene name    | (logAX4/F-) |
|--------------|--------------|-------------|
| DDB_G0276469 | syn16B       | 3.40        |
| DDB_G0284677 | expl2        | 2.80        |
| DDB_G0280761 | DDB_G0280761 | 2.29        |
| DDB_G0274801 | DDB_G0274801 | 2.21        |
| DDB_G0291396 | DDB_G0291396 | 2.10        |
| DDB_G0288817 | osbK         | 1.73        |
| DDB_G0277903 | cotE         | 1.72        |
| DDB_G0272218 | DDB_G0272218 | 1.47        |
| DDB_G0282407 | DDB_G0282407 | 1.46        |
| DDB_G0293806 | DDB_G0293806 | 1.22        |
| DDB_G0274121 | abcA4        | 1.17        |
| DDB_G0278963 | DDB_G0278963 | 1.11        |
| DDB_G0284909 | DDB_G0284909 | 1.09        |
| DDB_G0278507 | DDB_G0278507 | 1.09        |
| DDB_G0276375 | DDB_G0276375 | 1.05        |
| DDB_G0268076 | DDB_G0268076 | 1.05        |
| DDB_G0272156 | DDB_G0272156 | 1.01        |
| DDB_G0279973 | DDB_G0279973 | -1.17       |
| DDB_G0293048 | DDB_G0293048 | -1.50       |

PST genes

| DDB_G ID     | gene name    | (logAX4/F-) |
|--------------|--------------|-------------|
| DDB_G0292636 | DDB_G0292636 | 3.19        |
| DDB_G0267476 | sigK         | 3.16        |
| DDB_G0270980 | DDB_G0270980 | 2.85        |
| DDB_G0270942 | DDB_G0270942 | 2.51        |
| DDB_G0271662 | pks10        | 2.01        |
| DDB_G0273213 | aslA-1       | 1.85        |
| DDB_G0283885 | DDB_G0283885 | 1.74        |
| DDB_G0278823 | DDB_G0278823 | 1.67        |
| DDB_G0293864 | DDB_G0293864 | 1.49        |
| DDB_G0273357 | DDB_G0273357 | 1.37        |
| DDB_G0275687 | abcG18       | 1.34        |
| DDB_G0275265 | etnKB        | 1.32        |
| DDB_G0269530 | DDB_G0269530 | 1.32        |
| DDB_G0283811 | mcfR         | 1.29        |
| DDB_G0267898 | DDB_G0267898 | 1.26        |
| DDB_G0272464 | DDB_G0272464 | 1.23        |
| DDB_G0289605 | DDB_G0289605 | 1.16        |
| DDB_G0269132 | ecmB         | 1.03        |
| DDB_G0270756 | gtaG         | 1.03        |
| DDB_G0284675 | DDB_G0284675 | -1.05       |
| DDB_G0278951 | DDB_G0278951 | -1.18       |
| DDB_G0281011 | DDB_G0281011 | -1.38       |



**Q-rich**

*Dd BzpF* MS LIEGDSIYNLFQTQDLGIDFASSIVPDSPNKF-KKNANVFNNFQQQQQQIQOONKQSN  
*Dp BzpF* MS LIESDSLYNLFQTQDLGIDFTSSIVPDSPNKFGKNNNNNFNTYQQQQLOQQQQLO--  
 \*\*\*\*\*.\*:\*:\*\*\*\*\*:\*\*\*\*\* \*\*.\*.\*.\*:\*:\*\*\*\*.\*.\*.\*.\*

*Dd BzpF* GLIYNNNNNNNNNNNNNNNNSSSSNNNNSSSSNNNNNNNNNNQNHNNNNNNQNHNNIQH  
*Dp BzpF* -----QQQQQQQQIQNKQSNIIYNNSNNTNQ-----  
 .....\*.\*:\*:.....\*\*\*\*\*.\*

*Dd BzpF* NNAQSQVYINHNSNGSQQEQLFSIYLQPEKENELNNSYHDNVNNNNNNNNNNNNNNNNNI  
*Dp BzpF* -----QVFINNQN-----EELFSIFLQPEKENDL-----NNNNSNDNVNNI  
 \*\*:\*:\*:\*.\* \*:\*:\*\*\*\*\*:\*:\*\*\*\*:\*:\*.\*

**Q-rich**

*Dd BzpF* NLNHAQQQQQQHHLPHGQPHNNNNNNQFYQIKNPMEEIYSSNGIVPNQEPNKKVEYM-NE  
*Dp BzpF* MHNHQQQQQQQH--HQQP-----QQF----N----IY-SNGIVPNQDQIKKMDFMND  
 .\*.\*.\*\*\*\*\*\*.\* \*.\* \*\* \*\* \* \*\* \*\*\*\*\*:.\*.\*:.\* \*:

*Dd BzpF* PIKQNHYNIVPESIFDVPFGVSSQTMLNVPSTNNANNNNNNNNNNNNNNNKNINFKQPIQP  
*Dp BzpF* QMKQNHYNIVPESVFDVPFGISSQPMLNM-----QQQQQNNQKMNFKQPIQP  
 .:\*:\*\*\*\*\*:\*:\*\*\*\*\*:\*:\*\*\*.\*:\*\*: .....\*:\*:.\*:\*\*\*\*\*

*Dd BzpF* NQ-LIPIPPHSNQNNNISLNNNSNSNSNPNNNNNNNNNNISTQINNLNNINNNQNNQLNG  
*Dp BzpF* NQTLIPIPPNLLNPNQVSILQNIQIPQH-NINNNTNNNQ-N'TTTNNNNNN-----  
 \*\* \*\*\*\*\*:.\*.\*:\*:.\*.\*.....: \*.:\*:\*:\*:\*:\*:\*:\*:\*:.\*.\*.\*.\*

**NLS**

*Dd BzpF* SNNGKKKEEDKSIKKRKFISSTPVKGENGGTTLIPTTDGGFNMDEERHQKRQRLVKNRE  
*Dp BzpF* -NNKKEEDKSIKKRKFISSTPVKGENG-TTLIPTTDGSFNMDEERHMKRQRLVKNRE  
 \*.\*.\*\*\*\*\*:\*\*\*\*\*.\*:\*\*\*\*\*.\*:\*\*\*\*\*.\*:\*\*\*\*\*.\*:\*\*\*\*\*.\*:\*\*\*\*\*

**\* CREB Signature**

*Dd BzpF* AAQLFRQRQKAYIQDLEKKVSDLTGTNSEFRARVELLNSENKLIREQLLYLRNFVTQAVS  
*Dp BzpF* AAQLFRQRQKAYIQDLEKKVSDLTGTNSEFRARVELLNSENKLIREQLLYLRNFVTQAVS  
 \*\*\*\*\*:\*\*\*\*\*.\*:\*\*\*\*\*.\*:\*\*\*\*\*.\*:\*\*\*\*\*.\*:\*\*\*\*\*.\*:\*\*\*\*\*

**bZIP**

*Dd BzpF* FSPFKGGSNGTNSPSGVADQFLNSILPPGLNSPLPQGILPAGMNLQNPMIMSAIAEAASK  
*Dp BzpF* FSPFK-GAPGSNSPTGAADQFLNSILPPGLNSPLPQGILPAGMNLQNPMIMSAIAEAASK  
 \*\*\*\*\* \*:\*:\*:\*:\*:\*:\*\*\*\*\*:\*\*\*\*\*.\*:\*\*\*\*\*.\*:\*\*\*\*\*.\*:\*\*\*\*\*.\*:\*\*\*\*\*

*Dd BzpF* NSTFRQNIQGNLLGTPIPSQSSLTNSGNNSPNKPLNNNNNNNNINNNNNNNPSSPNN  
*Dp BzpF* NSTFRQNIQSNLLGTPIPSQSSLSNSGNNSPTKQNNPSSPNNNNNNNNNNNTMTNT  
 \*\*\*\*\*.\*:\*\*\*\*\*.\*:\*\*\*\*\*.\*:\*\*\*\*\*.\*:\*\*\*\*\*.\*:\*\*\*\*\*.\*:\*\*\*\*\*.\*:\*\*\*\*\*.\*:\*\*\*\*\*.\*:\*\*\*\*\*

*Dd BzpF* LNNNNNISPNSSSTSHQVPYLPQNTPPQOS---TPNQR  
*Dp BzpF* QNNNNNISPASSLHQVPYL--NTPPQASNNCSPNQR  
 .\*:\*\*\*\*\*.\*:\*:\*\*\*\*\* \*\*\*\*\*.\* :\*\*\*\*\*

**Fig. S1. Amino acid sequence alignment of *D. discodeum* (*Dd*) and *D. purpureum* (*Dp*) BzpF**  
 Predicted amino acid sequence of *Dp BzpF* is made from a contig assembled from RNA-seq reads (Pai 2011). Two poly-Glutamine sequences (Q-rich), bZIP domain, CREB Signature sequence and Nuclear Localization Signal (NLS) are indicated. Asterisk shows the Serine residue in a PKA phosphorylation consensus sequence. Arrowhead indicates the end of the truncated BzpF peptide (1-137 amino acids) expressed as a consequence of deletion in *bzpF<sup>-</sup>*. Note that the sequence of C-terminal half including bZIP domain and a short N-terminal sequence (1-56 amino acids) are conserved.

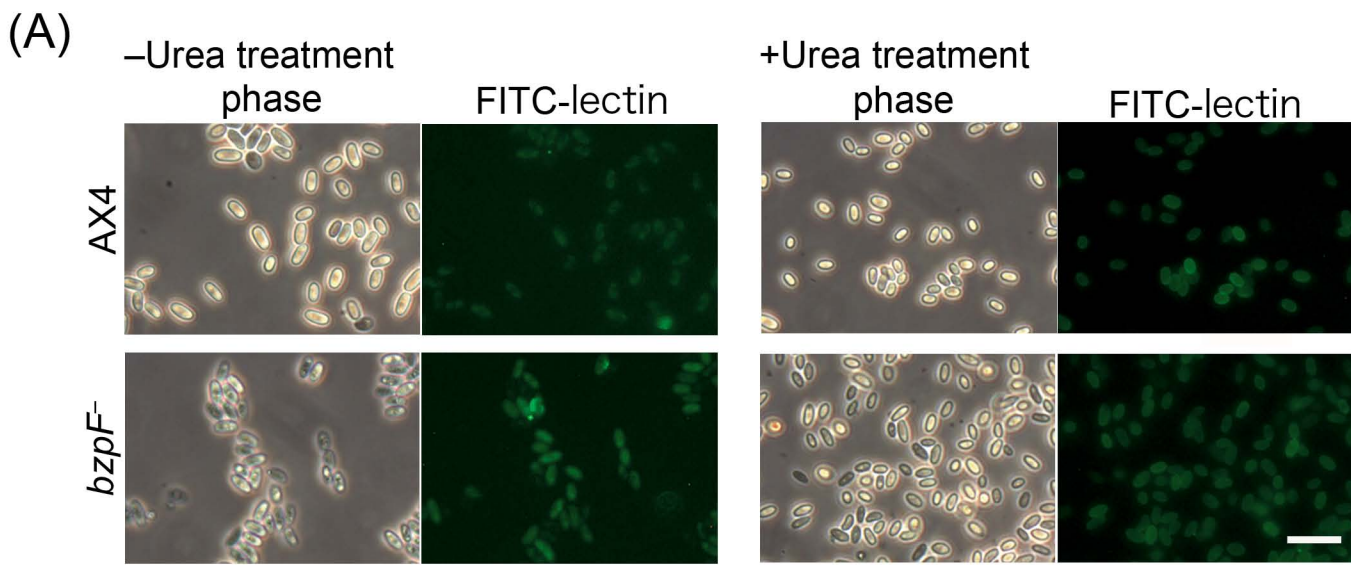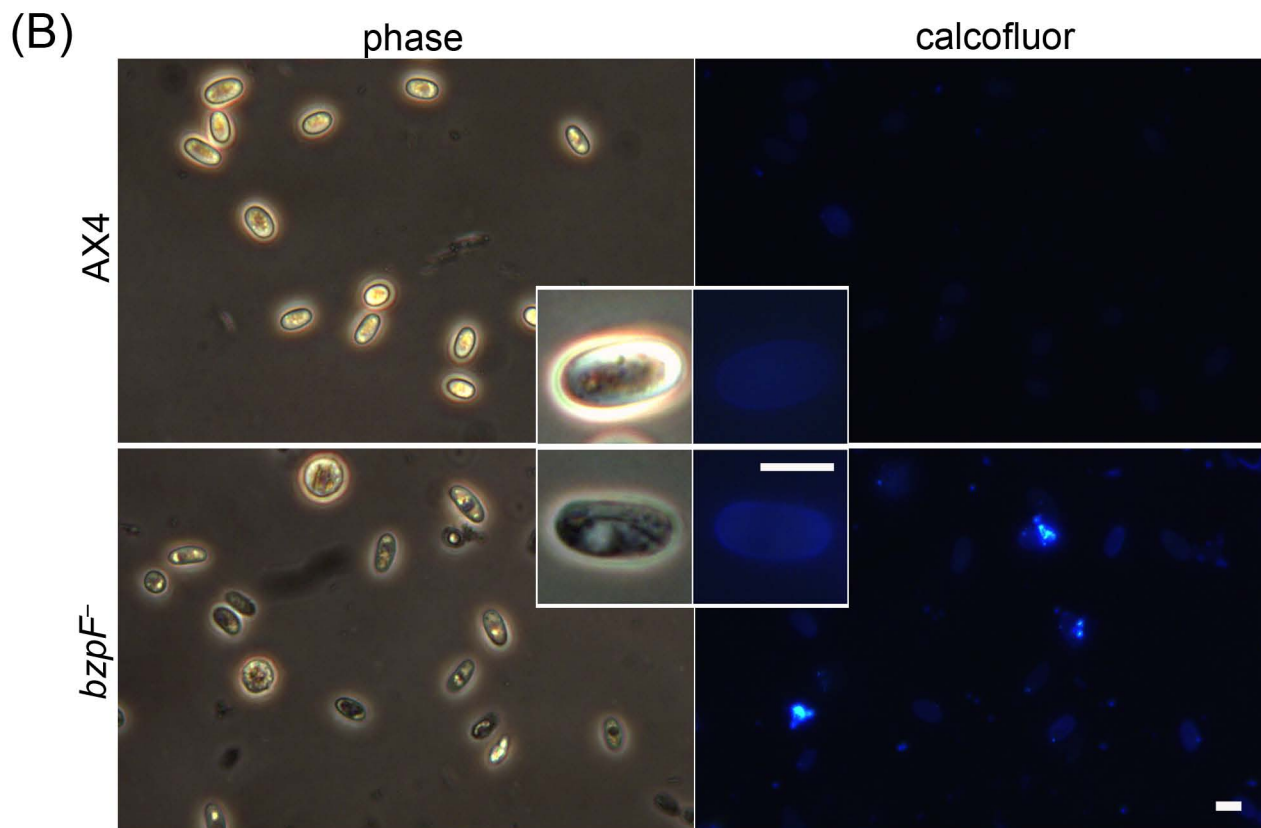

**Fig. S2. *bzpF*<sup>-</sup> spores are compromised.** We tested spores of AX4 and *bzpF*<sup>-</sup> from 2-day old fruiting bodies by phase-contrast microscopy and by staining with fluorescent dyes. Strain names are indicated on the left of each panel and the visualization method is on the top. (A) Staining with FITC-lectin to test the integrity of spores in AX4 and *bzpF*<sup>-</sup> with/without urea treatment. Bar = 20  $\mu$ m. (B) Calcofluor white staining to test the integrity of the middle spore coat layer. Bar = 5  $\mu$ m.
